# Supplementary material for: Preparation of hybrid paper electrode based on hexagonal boron nitride integrated graphene nanocomposite for free-standing flexible supercapacitors
Source: PubMed Central journal article supplement — RSC Adv. 2021 Jan 15;11(6):3445–51. doi: 10.1039/d0ra10735b (PMC8694011; doi:10.1039/d0ra10735b), 2021-01-15
Supplement: RA-011-D0RA10735B-s001.pdf [file RA-011-D0RA10735B-s001.pdf]

## Electronic Supplementary Information

### Preparation of Hybrid Paper Electrode Based on Hexagonal Boron Nitride Integrated Graphene Nanocomposite for Free-standing Flexible Supercapacitors

Jerome Rajendran<sup>a</sup>, Anatoly N. Reshetilov<sup>b</sup> and Ashok K. Sundramoorthy<sup>a\*</sup>

<sup>a</sup>Department of Chemistry, SRM Institute of Science and Technology, Kattankulathur-603  
203, Tamil Nadu, India

<sup>b</sup>G.K. Skryabin Institute of Biochemistry and Physiology of Microorganisms of the Russian Academy of Sciences (IBPM RAS),-Subdivision of “Federal Research Center Pushchino Biological Research Center of the Russian Academy of Sciences”(FRC PBRC RAS),  
142290, Pushchino, Moscow oblast, Russia

**\*Corresponding author**

**Email: [ashokkus@srmist.edu.in](mailto:ashokkus@srmist.edu.in)**

## Supporting Figures/Scheme/Table

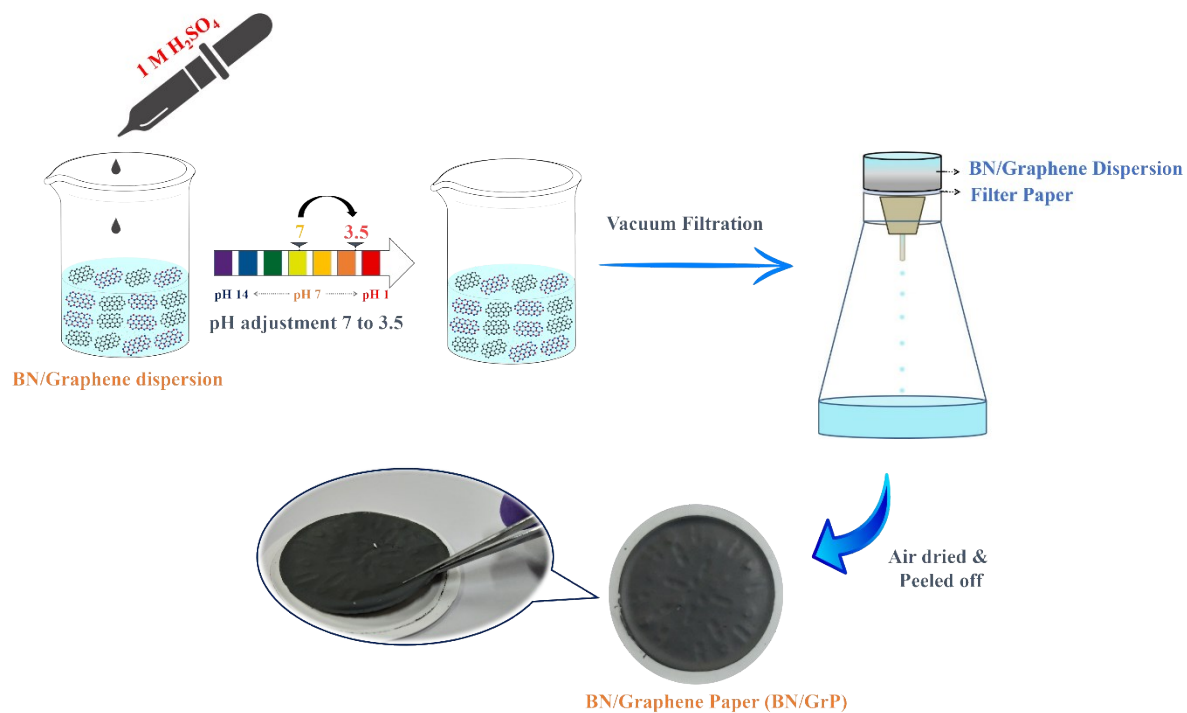

**Scheme S1.** Schematic illustration for the preparation of freestanding BN/GrP flexible paper using BN/graphene dispersion.

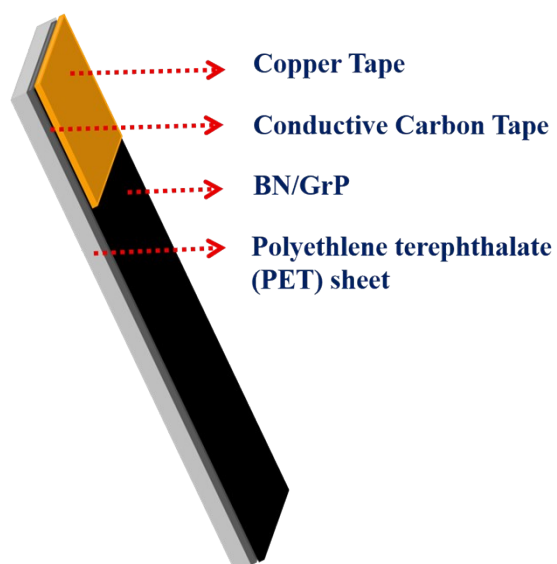

**Fig. S1.** Preparation of BN/GrP electrode for electrochemical measurements of supercapacitor.

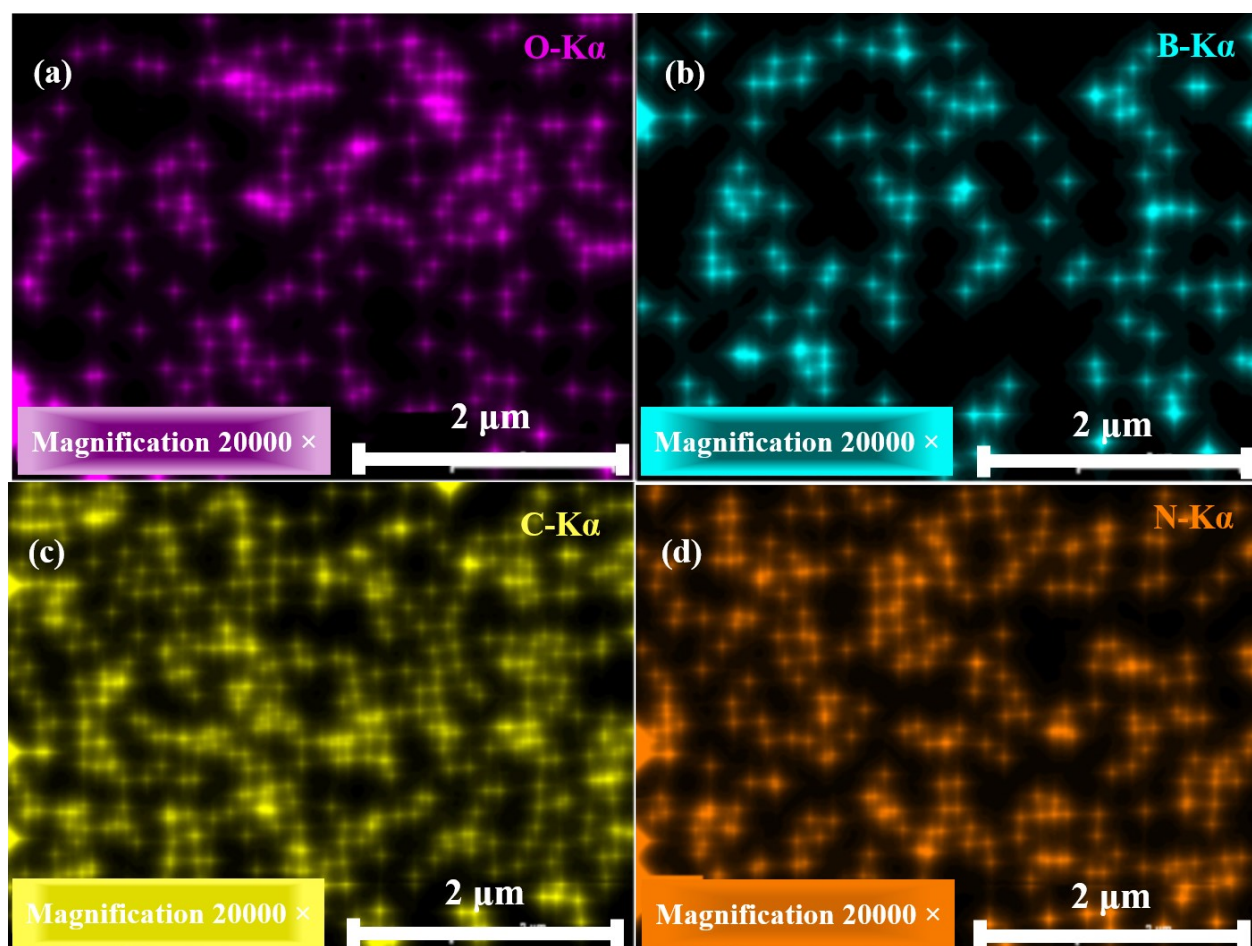

**Fig. S2.** EDX mapping analysis of BN/GrP: (a) oxygen, (b) boron, (c) carbon and (d) nitrogen.

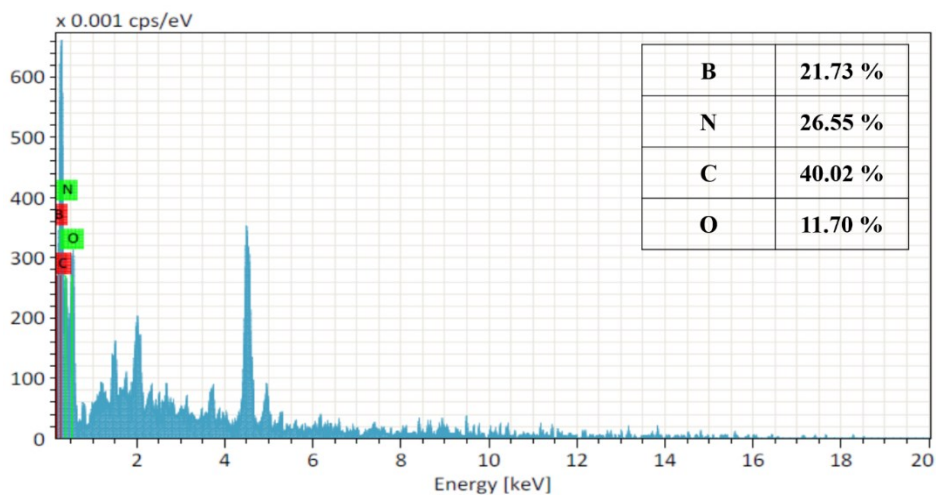

**Fig. S3.** EDX spectrum of BN/GrP (inset: atomic percentages of elements present in BN/GrP).

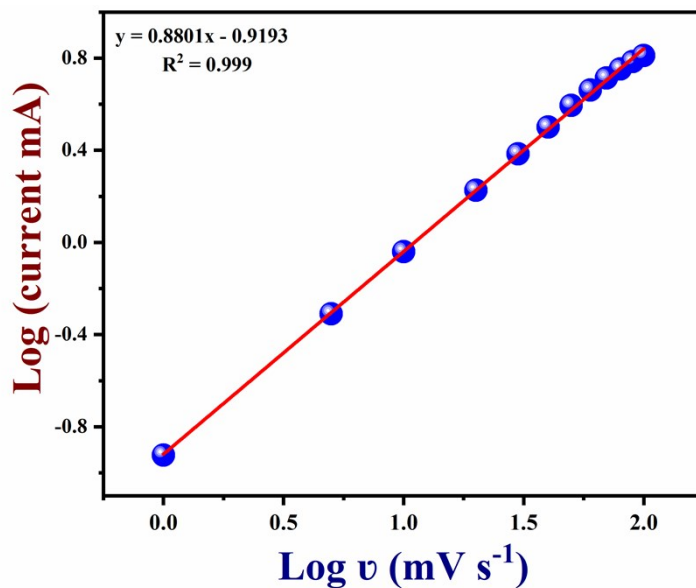

**Fig. S4.** The log of peak current was plotted against the log of scan rate to determine the “b” value of the BN/GrP from the anodic curve of different scan rates.

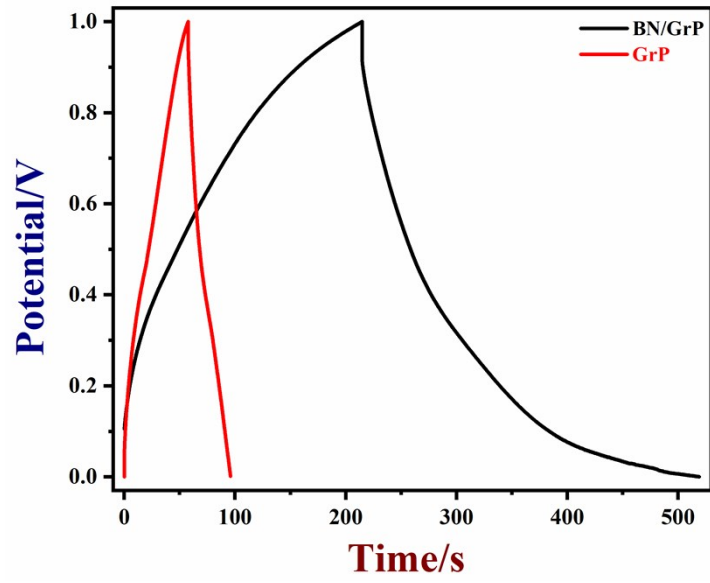

**Fig. S5.** Galvanostatic charge/discharge (GCD) curves of GrP and BN/GrP electrodes at a current density of  $1 \text{ Ag}^{-1}$ .

**Table S1.** Comparison of specific capacitances, retention and power density of the reported supercapacitors.

| <b>Active Material</b>                  | <b>Method of preparation</b>                           | <b>Electrolyte solution</b>           | <b>Capacitance</b>                              | <b>Power density</b>                              | <b>Cycles/Retention</b> | <b>Ref.</b>          |
|-----------------------------------------|--------------------------------------------------------|---------------------------------------|-------------------------------------------------|---------------------------------------------------|-------------------------|----------------------|
| rGO film                                | Brush-coating/annealing                                | 6 M KOH                               | 81.7 Fg <sup>-1</sup> at 10 mV s <sup>-1</sup>  | 1.5 kW.kg <sup>-1</sup> at 3 Ag <sup>-1</sup>     | 1500 - 93.8%            | <sup>1</sup>         |
| Graphene paper                          | freeze-drying                                          | 1 M H <sub>2</sub> SO <sub>4</sub>    | 172 Fg <sup>-1</sup> at 1 Ag <sup>-1</sup>      | -                                                 | 5000 – 99%              | <sup>2</sup>         |
| MnO <sub>2</sub> -coated<br>3D graphene | Electrochemical<br>deposition on pressed Ni<br>foam    | 0.5 M Na <sub>2</sub> SO <sub>4</sub> | 130 Fg <sup>-1</sup> at 1 mV s <sup>-1</sup>    | 62 W.kg-1                                         | 5000 – 82%              | <sup>3</sup>         |
| GrP/10-MnO <sub>2</sub>                 | Vacuum filtration and<br>electrochemical<br>deposition | 0.1 M Na <sub>2</sub> SO <sub>4</sub> | 385.2 Fg <sup>-1</sup> at 1 mV s <sup>-1</sup>  | 3.72 kW.kg <sup>-1</sup> at 4<br>Ag <sup>-1</sup> | 5000 – 85.4%            | <sup>4</sup>         |
| GrP                                     | Vacuum filtration                                      | 1 M H <sub>2</sub> SO <sub>4</sub>    | 195.8 Fg <sup>-1</sup> at 1 mV s <sup>-1</sup>  | -                                                 | 10000 - 93.2%           | <sup>5</sup>         |
| BN/GrP                                  | Vacuum filtration<br>method                            | 1M H <sub>2</sub> SO <sub>4</sub>     | 321.95 Fg <sup>-1</sup> at 0.5 Ag <sup>-1</sup> | 3.5 kW.kg <sup>-1</sup> at 9 Ag <sup>-1</sup>     | 6000 - 96.3%            | <b>This<br/>work</b> |

## Supporting references

- 1 W. Liu, X. Yan, J. Lang, C. Peng and Q. Xue, *J. Mater. Chem.*, 2012, **22**, 17245–17253.
- 2 F. Liu, S. Song, D. Xue and H. Zhang, *Adv. Mater.*, 2012, **24**, 1089–1094.
- 3 Y. He, W. Chen, X. Li, Z. Zhang, J. Fu, C. Zhao and E. Xie, *ACS Nano*, 2013, **7**, 174–182.
- 4 O. Sadak, W. Wang, J. Guan, A. K. Sundramoorthy and S. Gunasekaran, *ACS Appl. Nano Mater.*, 2019, **2**, 4386–4394.
- 5 O. Sadak, A. K. Sundramoorthy and S. Gunasekaran, *Carbon*, 2018, **138**, 108–117.
